# Supplementary material for: Genomic divergence within non-photosynthetic cyanobacterial endosymbionts in rhopalodiacean diatoms
Source: PubMed Central journal article supplement (PMC5638926; doi:10.1038/s41598-017-13578-8), 2017-10-12

**Title:**

**Genomic divergence within non-photosynthetic cyanobacterial endosymbionts in rhopalodiacean diatoms**

Authors: Takuro Nakayama\* and Yuji Inagaki

Center for Computational Sciences, University of Tsukuba, 1-1-1 Tennoudai, Tsukuba, Ibaraki 305-8577, Japan

**Supplementary Figure Legends**

**Figure S1.** Normalized rates of non-synonymous substitution for total gene set and genes for the chlorophyll *a* and vitamin B<sub>12</sub> biosynthetic pathways. Each boxplot represents the distribution of non-synonymous substitution rates (dN values) on protein-coding genes in the *RgSB* genome, which were normalized by that of counterpart genes from *Cyanothece* spp. genomes (see material and method section in the main text). The difference in the normalized dN values between the total gene set and the Chl-*a* biosynthetic genes appeared to be significant (the Wilcoxon rank-sum test,  $P = 0.00029$ ). On the other hand, no significant difference in the dN value distribution was observed in the same test considering the genes for vitamin B<sub>12</sub> biosynthesis (the Wilcoxon rank-sum test,  $P = 0.3277$ ). Outliers were not displayed in this graph.

**Figure S2.** Sequence comparison of the methionine synthase from the *RgSB*, *EtSB* and free-living cyanobacteria. (a) Multiple-alignment of the amino acid sequences. (b) Pairwise identity matrix of sequences displayed in (a). The values indicate percentages of amino acid identity.

**Figure S3.** Phylogenetic tree topologies used in CODEML analyses.

**Figure S1**

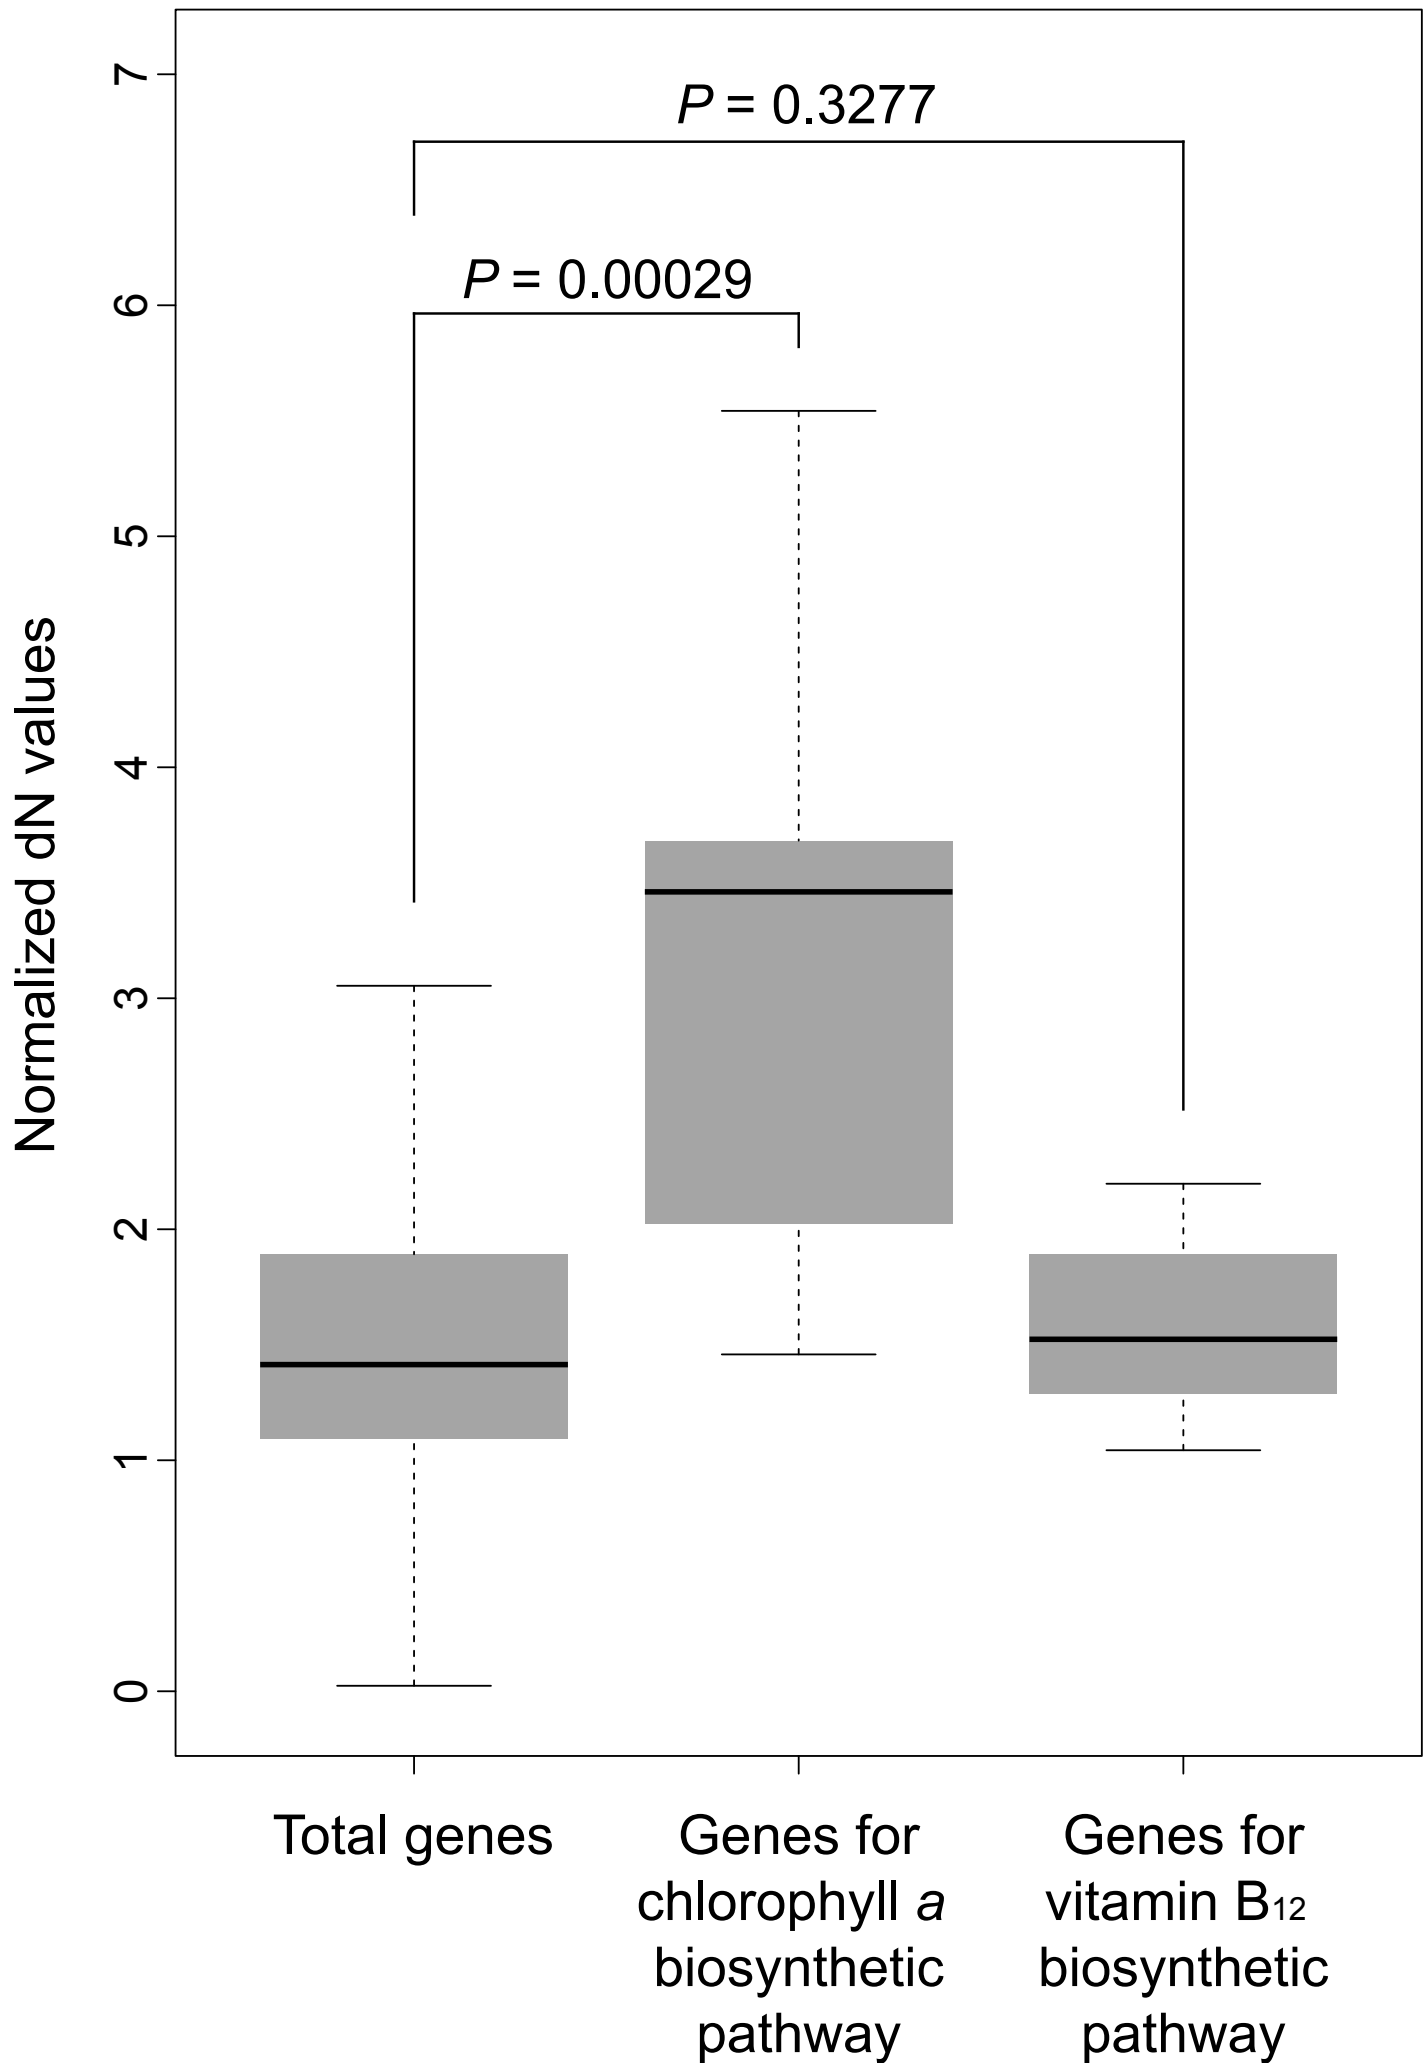



**Figure S3**

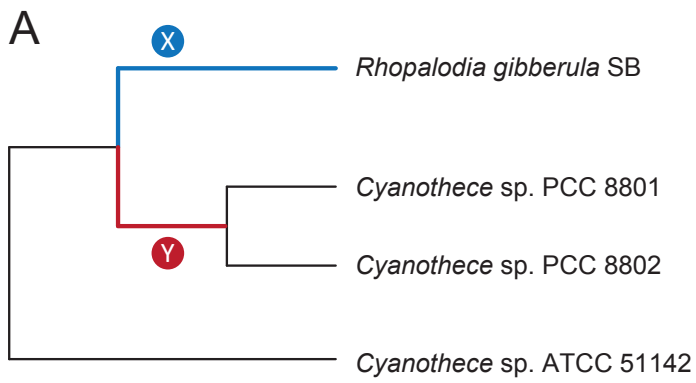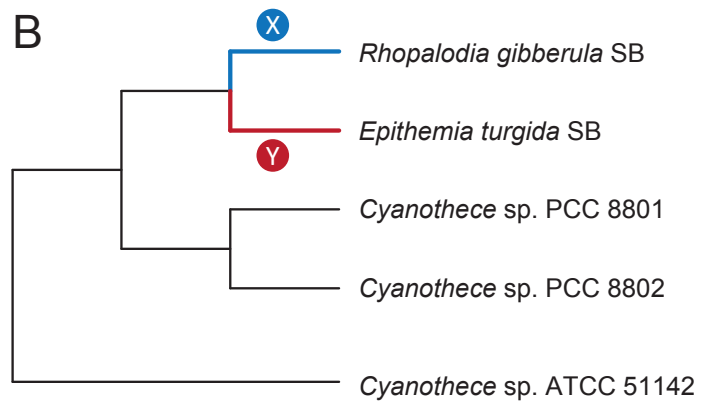

Supplement: 41598_2017_13578_MOESM1_ESM.pdf [file 41598_2017_13578_MOESM1_ESM.pdf]
